# Supplementary material
Source: PubMed Central journal article supplement (PMC4754183)
Supplement: supp_151422_151422-dec-1-at.pdf [file supp_151422_151422-dec-1-at.pdf]

## **Appendix 1 (as submitted by the authors): Prevalence data for Syrian refugees**

WHO vaccine-preventable diseases: monitoring system. 2015 global summary.

[http://apps.who.int/immunization\\_monitoring/globalsummary/countries?countrycriteria%5Bcountry%5D%5B%5D=SYR&commit=OK](http://apps.who.int/immunization_monitoring/globalsummary/countries?countrycriteria%5Bcountry%5D%5B%5D=SYR&commit=OK).

Sengupta N, Breuer J. A global perspective of the epidemiology and burden of Varicella-Zoster Virus. *Current Pediatric Reviews* 2009;5:207-28.

Greenaway C, Boivin JF, Cnossen C, et al. Risk factors for susceptibility to varicella in newly arrived adult migrants in Canada. *Epidemiol Infect* 2014;142:1695-707.

WHO Global TB database. <http://www.who.int/tb/country/en/>.

Cookson S, Abaza H, Clarke K, et al. Impact of and response to increased tuberculosis prevalence among Syrian refugees compared with Jordanian tuberculosis prevalence: case study of a tuberculosis public health strategy. *Conflict and Health* 2015;18. doi: 10.1186/s13031-015-0044-7

Kowdley K, Wang C, Welch S, Roberts H, Brosgart C. Prevalence of chronic hepatitis B among foreign-born persons living in the United States by country of origin. *Hepatology* 2012;56:422-33.

Gower E, Estes C, Blach S, Razavi-Shearer K, Razavi H. Global epidemiology and genotype distribution of the hepatitis C virus infection. *J Hepatol* 2014;61:S45-57.

Chemaitelly H, Chaabna K, Abu-Raddad LJ. The Epidemiology of Hepatitis C Virus in the Fertile Crescent: Systematic Review and Meta-Analysis. *PLoS One* 2015 10(8):e0135281.

UNAIDS 2014. Local epidemics issues brief. UNAIDS / JC2559/1/E ISBN 978-92-9253-039-6 © UNAIDS, June 2014 Joint United Nations Programme on HIV/AIDS (UNAIDS).

[http://www.unaids.org/sites/default/files/media\\_asset/JC2559\\_local-epidemics\\_en.pdf](http://www.unaids.org/sites/default/files/media_asset/JC2559_local-epidemics_en.pdf) (accessed Dec 7, 2015)

Schär F, Trostorf U, Giardina F, et al. Strongyloides stercoralis: Global Distribution and Risk Factors. *PLoS Negl Trop Dis* 2013;7:2e2288.
