# Supplementary material
Source: PubMed Central journal article supplement (PMC4754183)
Supplement: supp_151422_caring-for-a-newly-arrived-syrian-refugee-family-fr.pdf [file supp_151422_caring-for-a-newly-arrived-syrian-refugee-family-fr.pdf]

Il s'agit ici de la version intégrale acceptée de l'article fourni par les auteurs. La version définitive corrigée et mise en forme du document sera diffusée ultérieurement. Publié le 8 décembre 2015.

## *Pratique*

# S'occuper d'une famille de réfugiés syriens nouvellement arrivés

Kevin Pottie, M.D., M. Sc. Cl., Christina Greenaway, M.D., M. Sc., Ghayda Hassan, Ph. D., Charles Hui, M.D., Laurence J. Kirmayer, M.D.

**Affiliations :** Institut de recherche Bruyère, Département de médecine familiale, Université d'Ottawa (Pottie); Maladies infectieuses et microbiologie, Université McGill (Greenaway); Psychologie, Université du Québec à Montréal (Hassan); Maladies infectieuses (pédiatrie), Université d'Ottawa (Hui); Psychiatrie, Division de psychiatrie sociale et transculturelle, Université McGill (Kirmayer).

Correspondance adressée à : Kevin Pottie, kpottie@uottawa.ca

Fatima, Omar et Ruya Sarraf sont des réfugiés originaires de la Syrie nouvellement arrivés au Canada. Ils ont rendez-vous avec leur nouveau médecin de famille. La famille a vécu pendant trois ans dans un camp de réfugiés établi en Jordanie par le Haut Commissariat des Nations Unies pour les réfugiés; elle se trouve maintenant au Canada dans le cadre du Programme de réinstallation des réfugiés et des personnes protégées à titre humanitaire.[Boîte de texte 1]<sup>1-10</sup>

### **Boîte de texte 1 : La situation en Syrie et la réponse du Canada**<sup>1-10</sup>

La guerre civile qui sévit actuellement en Syrie se classe au premier rang des pires catastrophes pour l'humanité de l'ère moderne. Plus de la moitié des citoyens de la Syrie ont été déplacés de force; on compte près de 8 millions de personnes déplacées à l'intérieur du pays et 4,5 millions de réfugiés qui, pour la plupart, ont fui vers les pays voisins, à savoir la Jordanie, le Liban et la Turquie<sup>1-3</sup>. Plus de la moitié des personnes déplacées de force sont des enfants et, de ce nombre, près de 75 % sont âgés de moins de 12 ans<sup>4</sup>. Comme les conditions de vie se sont détériorées dans les camps de réfugiés turcs en 2015, des centaines de milliers de Syriens ont fui vers l'Europe. Des milliers de personnes ont perdu la vie au cours de ce périlleux voyage.

Les déplacements répétés sont une des particularités frappantes du conflit en Syrie, étant donné que les lignes de front sont constamment déplacées et que des zones auparavant sécuritaires deviennent parties prenantes du conflit. Les épisodes de violence sont aggravés par différents facteurs de stress, dont la précarité des conditions de vie, la perte de membres de sa famille et de tout soutien, l'isolement social, la discrimination, l'exploitation et l'incertitude quant à l'avenir<sup>4</sup>.

Le gouvernement du Canada met en œuvre un programme qui lui permettra de procéder rapidement à la réinstallation de 25 000 réfugiés syriens au Canada, à titre humanitaire, au cours des prochains mois. En collaboration avec des organisations internationales au Liban et en Jordanie, le Canada sélectionne des réfugiés et veille à leur transport dans différentes villes du pays.

L'établissement sur le plan de la santé consiste à réaliser une évaluation de l'état de santé des réfugiés, qui se fonde sur des données probantes, et à intégrer ces derniers dans le système de santé. Au cours des dernières années, nous avons renforcé les réseaux de professionnels de la santé en place au Canada pour soutenir les réfugiés. Des ressources destinées exclusivement à ces derniers ont été élaborées, y compris des lignes directrices rédigées par la Collaboration canadienne pour la santé des immigrants et des réfugiés (CCSIR)<sup>2</sup> et des ressources conçues spécialement pour les enfants réfugiés par la Société canadienne de pédiatrie<sup>5</sup>. Ces réseaux, les groupes de défense de la santé, comme les Cliniciens canadiens pour les soins aux réfugiés, et les réseaux provinciaux (p. ex. le programme Bilan de santé des réfugiés du Québec) travaillent actuellement à l'établissement des réfugiés, en collaboration avec les organismes municipaux.

Les réfugiés de la Syrie représentent un apport positif important au chapitre du capital social et humain; ce capital peut se révéler bénéfique pour la société canadienne, en plus de contribuer à la croissance économique du pays, en particulier lorsque les conditions de réinstallation des réfugiés favorisent leur résilience.

L'empathie, le réconfort et le soutien sont les principaux éléments cliniques du processus de rétablissement des réfugiés qui éprouvent des problèmes de santé mentale. Un soutien social et affectif peut réduire la gravité des symptômes de l'état de stress post-traumatique (ESPT) et de la dépression et faciliter le processus de rétablissement, quoique les patients souffrant de symptômes persistants puissent nécessiter une intervention psychothérapeutique particulière<sup>2</sup>. Offrir aux réfugiés l'accès à un logement adéquat et sécuritaire, à un emploi et à un revenu, assurer la cohésion familiale et laisser les parents et les enfants ensemble pendant et après le processus d'intégration peuvent avoir des effets protecteurs importants sur la santé<sup>6-7</sup>. Inversement, des conditions de réinstallation difficiles, comme l'insécurité, les difficultés économiques, le chômage et l'exclusion sociale/isolément, peuvent aggraver les symptômes<sup>8-10</sup>.

Fatima a 28 ans, Omar a 32 ans et Ruya (qui signifie « vision » ou « rêve » en arabe) a 4 ans. Ils n'ont aucun dossier de santé ou d'immunisation. Dans le bureau, Ruya est silencieuse, mais semble anxieuse, et se montre très réticente à l'idée de s'éloigner de sa mère. Ils parlent tous l'arabe couramment, mais aucun d'entre eux ne parle l'anglais ou le français. Un interprète accompagne la famille.

### **À quelles interventions la famille Sarraf aura-t-elle été soumise avant son arrivée au Canada?**

---

Les antécédents médicaux des membres de la famille Sarraf auront été analysés; de même, ces derniers auront été soumis à un examen médical physique ciblé conformément à l'examen médical réglementaire prévu dans le cadre de la procédure d'immigration<sup>1</sup>. L'examen médical comprend une radiographie de l'abdomen pour détecter la tuberculose pulmonaire active chez les personnes de plus de 11 ans, un test de dépistage de la syphilis et du VIH pour les personnes de 15 ans et plus ainsi qu'une analyse d'urine pour les enfants et les adultes<sup>1</sup>. Les résultats de ces tests sont la propriété du gouvernement du Canada; seulement certains résultats, par exemple les résultats des tests de dépistage du VIH, sont communiqués aux travailleurs des établissements et aux responsables de la santé publique du Canada.

## Quelles interventions préventives devraient être envisagées lors de cette visite?

Lors de cette visite, une évaluation de la santé fondée sur des faits devrait être réalisée à l'endroit de la famille Sarraf; il faudrait notamment discuter de vaccination pour ce qui est des maladies pouvant être prévenues par un vaccin, de même que de vérifications d'ordre général. Ces interventions peuvent être acceptées ou refusées par la famille.

Les recommandations concernant les interventions préventives résumées ci-dessous ont été adaptées pour les réfugiés syriens nouvellement arrivés ne présentant aucun symptôme à partir des lignes directrices de la CCSIR<sup>2</sup> ainsi que d'autres lignes directrices. Ces recommandations tiennent compte des conclusions de rapports de surveillance européens, étant donné que l'Europe a accueilli près de 600 000 réfugiés syriens au cours de la dernière année. Aucun problème majeur en matière de santé publique n'a été signalé jusqu'à maintenant. Toutefois, puisqu'un grand nombre de réfugiés ont été hébergés dans des abris surpeuplés pendant une longue période, de multiples cas de gale sarcoptique humaine et de poux ont été rapportés. En de plus rares occasions, on a signalé des cas de rougeole, de leishmaniose cutanée et de fièvre récurrente à poux.<sup>3</sup>

Les verbes « recommander » et « déconseiller » sont utilisés ci-dessous lorsqu'il existe de bonnes raisons de croire qu'une intervention particulière serait bénéfique ou qu'elle ne le serait pas, selon le cas, au sein de la population de réfugiés. En ce qui concerne les interventions qui peuvent avoir une moins grande incidence sur le plan clinique, nous suggérons aux cliniciens d'« utiliser leur jugement » afin de déterminer s'ils doivent procéder à l'intervention.

### *Maladies pouvant être prévenues par la vaccination*

La couverture vaccinale chez les enfants en Syrie était de plus de 90 % avant la guerre. Toutefois, les dernières données compilées par l'Organisation mondiale de la Santé (OMS) et le Fonds des Nations Unies pour l'enfance (UNICEF) permettent d'estimer que de 43 à 52 % seulement des enfants réfugiés syriens ont reçu la primovaccination antidiphtérique, anticoquelucheuse et antitétanique ainsi que le vaccin antipoliomyélitique<sup>11</sup>. Les lignes directrices<sup>2</sup> de la CCSIR et le Guide canadien d'immunisation<sup>12</sup> recommandent d'offrir les vaccins offerts selon l'âge par les provinces aux enfants immigrants, comme Ruya, qui n'ont pas de dossier de vaccination ou dont le dossier à cet égard est peu fiable. En fonction de l'âge, les vaccins offerts pourraient inclure ceux qui préviennent la rougeole, les oreillons, la rubéole, la diphtérie, le tétanos, la coqueluche, le *haemophilus influenzae* de type b et la poliomyélite.

Fatima et Omar n'ont pas, eux non plus, de dossier de vaccination; par conséquent, comme tous les adultes dans leur situation (18 ans ou plus), ils devraient recevoir une dose du vaccin contre la rougeole, les oreillons et la rubéole, une primovaccination pour prévenir le tétanos, la diphtérie et la poliomyélite, ainsi qu'une première dose comprenant le vaccin anticoquelucheux acellulaire<sup>2-12</sup>. Les vaccins peuvent être inoculés sans que des tests sérologiques soient effectués au préalable.

Selon les données limitées qui sont disponibles en ce qui a trait à la région du Moyen-Orient et de la Méditerranée, la plupart des adolescents et des jeunes adultes (de 83 à 97 %) sont immunisés contre la varicelle<sup>13</sup>. Ces données sont également appuyées par une étude canadienne qui a conclu que presque tous les jeunes adultes (96 %) originaires de l'Afrique du Nord et du Moyen-Orient sont

immunisés contre cette maladie<sup>14</sup>. Puisque le vaccin contre la varicelle ne fait pas partie du programme de vaccination régulier de la Syrie, nous recommandons de donner le vaccin contre cette maladie à Ruya et aux autres enfants de moins de 13 ans.

Il peut y avoir un faible risque d'épidémie de varicelle au sein de cette population, qui compte des adultes vulnérables et des femmes enceintes à risque de maladie grave. Par conséquent, pour Fatima, Omar et les autres adultes syriens, les médecins pourraient envisager de faire des tests sérologiques pour la varicelle et de vacciner les personnes à risque. La vaccination sans test sérologique peut être envisagée dans certains contextes; toutefois, si elle est mise en œuvre à grande échelle, l'intervention sera plus coûteuse.

#### *Tuberculose*

En 2014, l'OMS a indiqué que le taux de tuberculose en Syrie était faible (17/100 000)<sup>15</sup>. Les taux déclarés de tuberculose active en Turquie et au Liban étaient également faibles en 2014, soit moins de 20 pour 100 000 habitants<sup>15</sup>. Une étude menée auprès de réfugiés syriens en Jordanie en 2015 a révélé un taux de tuberculose de 12 pour 100 000 habitants<sup>16</sup>. Dans les lignes directrices de la CCIRH<sup>2</sup> et les Normes canadiennes pour la lutte antituberculeuse<sup>17</sup>, on recommande de faire subir des tests de dépistage de la tuberculose latente aux groupes de migrants lorsque le taux de tuberculose dans le pays d'origine est supérieur à 30 pour 100 000 habitants. Étant donné que le taux de tuberculose en Syrie, dans les pays voisins et chez les Syriens dans les camps est en deçà de ce seuil, nous déconseillons de faire subir le test de Mantoux à la famille Sarraf et aux autres réfugiés syriens.

#### *Hépatite B*

On évalue le taux d'infection chronique par le virus de l'hépatite B (VHB) en Syrie à 5,6 %<sup>18</sup>. Les lignes directrices de la CCSIR<sup>2</sup> et l'Agence de la santé publique du Canada<sup>19</sup> recommandent, lorsque le taux d'infection chronique par le VHB est de 2 % ou plus, que les cliniciens veillent à la réalisation de tests sérologiques pour l'hépatite B chronique et l'immunité contre le VHB (antigène de surface de l'hépatite B, anticorps anti-HBc et anticorps anti-HBs) et procèdent à la vaccination des personnes non immunisées. Nous recommandons de faire subir des tests de dépistage du VHB à la famille Sarraf et à tous les réfugiés syriens, et de vacciner les personnes prédisposées à la maladie.

#### *Hépatite C*

Le taux déclaré d'infection par le virus de l'hépatite C (VHC) dans la région de l'Afrique du Nord et du Moyen-Orient et en Syrie est relativement faible (environ 1 %), à l'exception de l'Égypte<sup>20-21</sup>. Cependant, dans le contexte du conflit, des traumatismes et d'un système de soins de santé perturbé, il peut y avoir un risque accru d'exposition au VHC. En raison de l'incertitude relative à la séroprévalence du VHC chez la population syrienne et de la disponibilité des traitements curatifs (bien que ces traitements soient coûteux), les cliniciens peuvent envisager la sérologie pour Fatima et Omar, à l'instar de tous les adultes au sein de cette population, pour contrer toute infection par le VHC.

#### *Virus de l'immunodéficience humaine*

Tel qu'il a été mentionné précédemment, l'examen médical aux fins de l'immigration<sup>1</sup> comprend un test de dépistage du virus de l'immunodéficience humaine (VIH) pour tous les réfugiés adultes; ce

programme permet aux réfugiés qui sont séropositifs de recevoir un traitement clinique dans le cadre du système de santé publique. Le taux de VIH au Moyen-Orient est inférieur à 0,1 % (11). Nous déconseillons de faire subir à Fatima et à Omar, ou aux autres adultes dans la même situation, des tests de dépistage du VIH de routine à leur arrivée.

### *Strongyloides stercoralis*

Le taux d'infection au parasite intestinal *Strongyloides stercoralis* dans la région du Moyen-Orient demeure incertain. Des études communautaires limitées ont révélé que ce taux était relativement faible (inférieur à 5 %) <sup>23</sup>; toutefois, les populations de réfugiés <sup>24</sup> semblent présenter le taux de strongyloïdose le plus élevé. Étant donné l'exposition accrue possible au parasite *Strongyloides stercoralis* dans les camps de réfugiés en raison des conditions de vie insalubres, l'avantage possible de la prévention des cas mortels de strongyloïdose disséminée et le faible risque du traitement, les cliniciens peuvent envisager la sérologie en vue du dépistage du parasite *Strongyloides stercoralis* pour Fatima, Omar et Ruya. Des recherches plus approfondies pourraient donner lieu à la modification de cette recommandation.

Conformément aux lignes directrices de la CCSIR<sup>2</sup>, nous déconseillons de prélever des échantillons de selles pour le dépistage d'ovules et de parasites chez les réfugiés asymptomatiques.

## **Est-ce que les membres de la famille Serraf devraient passer des examens pour déceler les problèmes de santé mentale?**

---

Les membres de la famille Serraf pourraient avoir des problèmes de santé mentale en raison de la violence et de la migration ainsi que du contexte suivant la crise, ou encore de troubles mentaux préexistants<sup>4</sup>. L'adaptation et le rétablissement des réfugiés syriens ayant des troubles mentaux préexistants ou causés par les difficultés rencontrées peuvent être facilités ou entravés par les conditions de la migration, selon le cas.

Les problèmes mentaux les plus souvent rencontrés chez les réfugiés syriens sont les suivants : la dépression, le deuil compliqué, l'ESPT et divers types de troubles anxieux<sup>4</sup>. Il faut relever des preuves démontrant que les réfugiés sont incapables de fonctionner en société ou qu'ils souffrent beaucoup ou depuis longtemps afin de pouvoir poser un diagnostic pour un trouble mental courant, par exemple un ESPT ou une dépression, et ce, afin d'éviter que soient établis trop de diagnostics au sein du groupe visé<sup>4</sup>.

Les enfants réfugiés syriens non accompagnés, les Syriens qui ont été victimes d'actes de violence ou de torture à caractère sexuel ou fondée sur le sexe, les aînés de même que les réfugiés qui ont des besoins particuliers constituent des groupes particulièrement vulnérables. Les cas de violence à caractère sexuel ou fondée sur le sexe et les cas de torture ont augmenté de façon significative en raison du conflit; ils peuvent se traduire, pour les réfugiés, par des problèmes médicaux, psychologiques, sociaux, économiques ou juridiques<sup>25-26</sup>.

Il pourrait se révéler préjudiciable d'insister pour que les personnes qui fonctionnent normalement mais qui ont subi des actes de violence ou de torture à caractère sexuel ou fondée sur le sexe divulguent des détails sur ces événements traumatisants; en outre, cela fait augmenter les risques de traumatisme et de stigmatisation, en plus d'en amplifier les répercussions sur la famille et la

collectivité<sup>2</sup>. Nous déconseillons de procéder à des tests systématiques visant à détecter les cas d'ESPT; toutefois, nous suggérons que les médecins restent à l'affût des signes et des symptômes qui y sont rattachés (p. ex. des symptômes somatiques inexplicables, des troubles du sommeil ou des troubles mentaux comme la dépression ou un trouble panique)<sup>2</sup>.

### **Y a-t-il d'autres aspects auxquels il conviendrait d'accorder une attention particulière dans le cadre de cette visite?**

---

Le médecin de famille devrait documenter toutes les plaintes formulées par les patients, évaluer leurs signes vitaux et leur acuité visuelle, et s'assurer qu'ils n'ont pas d'affection ou de problème dentaire<sup>2</sup>. Dans le cas des femmes, comme Fatima, il faudrait discuter des besoins, urgents et autres, en matière de contraception et procéder à une numération globulaire complète, comprenant les variations applicables, en vue de dépister tout cas d'anémie<sup>2</sup>. En outre, les cliniciens devraient envisager de recommander les vaccins saisonniers, par exemple celui contre l'influenza, et rester à l'affût des cas de maladie transmissible sexuellement, de grossesse, de blessure ou d'incapacité, de même que des cas de traitement interrompu de diverses conditions ou maladies, comme l'hypertension et le diabète.

### **Y a-t-il d'autres éléments à prendre en considération?**

---

La compréhension des affections propres à la culture et des idiomes exprimant la détresse permettra d'améliorer la communication entre le médecin et le patient; en outre, cela pourrait permettre des interventions sécuritaires du point de vue culturel, le tout dans le but de favoriser la résilience sur les plans individuel et collectif<sup>2-4</sup>.

Au fil du temps, la région qui constitue aujourd'hui la Syrie a été peuplée par des gens issus de divers groupes ethniques et de différentes confessions religieuses, et elle a servi de havre à de nombreux groupes de réfugiés qui fuient la persécution et les conflits, notamment les Arméniens, les Assyriens, les Caucasiens, les Palestiniens et les Iraquiens. La plupart des Syriens sont considérés comme des Arabes; cela demeure toutefois uniquement fondé sur la langue qu'ils utilisent à l'oral (l'arabe), et non sur l'ethnicité ou la religion. Pour obtenir de plus amples renseignements sur les idiomes exprimant la détresse propres à la culture ou à la langue de ce groupe de réfugiés ainsi que sur les modèles culturels et religieux se rattachant aux maladies, veuillez consulter le document suivant : <http://www.unhcr.org/55f6b90f9.pdf><sup>4</sup>.

### **Retour sur une intervention**

---

Le médecin de famille a d'abord rempli une liste de contrôle électronique de la CCSIR pour chaque membre de la famille Serraf. Cette liste de contrôle (accessible gratuitement sur le site [http://www.ccirhken.ca/ccirh/checklist\\_website/](http://www.ccirhken.ca/ccirh/checklist_website/)) intègre les recommandations tirées des lignes directrices de la CCSIR<sup>2</sup> à un dossier adapté aux réfugiés nouvellement arrivés et explique comment le médecin de famille peut aborder toutes les questions de prévention et de santé en trois ou quatre visites. Cette liste de contrôle peut également servir à intégrer au processus les recommandations provenant des lignes directrices du Groupe d'étude canadien sur les soins de santé préventifs (<http://canadiantaskforce.ca>).

La liste de contrôle suggère de commencer par une approche de soins centrée sur le patient qui consiste à d'abord noter les problèmes soulevés par le patient. La famille en question n'a mentionné aucun problème médical. Le clinicien a demandé à Fatima et à Omar s'ils avaient besoin d'un logement ou s'ils avaient d'autres besoins sociaux, puis leur a offert une évaluation de santé.

Le médecin a consigné les antécédents de Fatima et d'Omar, et a examiné tous les membres de la famille en les soumettant notamment à une vérification de l'acuité visuelle et de la santé dentaire, avant de leur proposer des immunisations et une analyse sanguine, conformément aux lignes directrices de la CCSIR<sup>2</sup>.

Le médecin a fait subir à Fatima un test de grossesse, a vérifié si elle avait des besoins de contraception non comblés et a planifié d'autres examens de santé pour les visites suivantes. Fatima a appris au médecin de famille que Ruya était née au début de la guerre et que son nom, qui signifie « vision » ou « rêve », symbolise l'espoir que sa mère caresse pour sa famille.

Après d'autres discussions, le médecin a constaté qu'Omar était blessé à la jambe gauche en raison de la guerre et qu'il devrait marcher avec des béquilles et subir d'autres évaluations.

Ruya a manifesté un comportement anxieux pendant toute la visite, et Omar a expliqué que ce comportement était attribuable aux bombardements et aux déplacements répétés qu'elle a vécus. Le médecin de famille a posé quelques questions pour s'assurer que le développement global de Ruya est adéquat et que la famille est stable actuellement. Le médecin a également évalué les capacités personnelles et sociales de chaque parent en leur posant des questions sur leur réaction à leurs situations actuelles et passées<sup>27</sup>. Le médecin a indiqué qu'il souhaitait procéder à une évaluation approfondie des difficultés de la famille au cours d'une visite de suivi axée sur les soins primaires, puis, au besoin, offrir à la famille des services psychologiques ou la diriger vers une équipe interdisciplinaire de santé mentale pédiatrique. Le médecin a noté qu'Omar pourra être dirigé vers un chirurgien orthopédiste si la radiographie révèle que sa blessure à la jambe le justifie.

La boîte de texte 2 contient un sommaire des interventions fondées sur des données probantes qui sont effectuées auprès des réfugiés syriens.

### **Boîte de texte 2 : Sommaire des recommandations pour les réfugiés syriens**

Les réfugiés syriens ont vécu des crimes de guerre, des violations des droits de la personne, de la pauvreté et des déplacements pendant de longues périodes, ce qui peut avoir des répercussions sur leur santé physique et mentale.

Différentes mesures peuvent avoir d'importants effets protecteurs sur leur santé : leur donner accès à un logement sécuritaire et adéquat, leur permettre de travailler et de toucher un revenu, assurer la cohésion de leur famille et veiller à ce que les parents et les enfants restent ensemble pendant et après le processus d'intégration.

## Le clinicien en soins primaires :

ne doit pas procéder à un dépistage systématique des traumatismes, mais doit prêter attention aux signes de trouble du fonctionnement social ou aux souffrances importantes pouvant être attribuables à un l'état de stress post-traumatique, à une dépression, à un trouble anxieux ou à l'exposition à la violence liée à la guerre, puis diriger la personne vers les services adéquats pour qu'elle soit évaluée et suivie;

doit vacciner tous les enfants et les adultes dont le dossier d'immunisation n'est pas complet. Selon l'âge de la personne, il peut s'agir des vaccins contre la rougeole, les oreillons, la rubéole, la diphtérie, le tétanos, la coqueluche, l'*Haemophilus influenzae* B et la polio;

ne doit pas proposer le dépistage de la tuberculose latente parce que l'incidence de la tuberculose progressive au Moyen-Orient est faible;

doit procéder à un dépistage de l'hépatite B chronique chez tous les enfants et les adultes, vérifier leur immunité préalable et vacciner les sujets réceptifs;

doit envisager de procéder à une sérologie de la varicelle et vacciner les sujets réceptifs; beaucoup de Syriens sont déjà immunisés;

doit envisager de procéder à un dépistage de l'hépatite C; la prévalence de cette infection parmi les réfugiés syriens est actuellement inconnue, mais pourrait avoir augmenté en raison de la guerre;

devrait envisager de procéder à une sérologie du parasite intestinal Strongyloïdes, sans toutefois prélever d'échantillons de selles humaines, sauf si le patient éprouve des symptômes abdominaux.

### Boîte de texte 3 : Ressources à l'intention des cliniciens prodiguant des soins aux réfugiés syriens

1. Liste de contrôle interactive pour la prévention chez les nouveaux immigrants et les réfugiés, Canadian Collaboration for Immigrant and Refugee Health (en anglais et en français) [http://www.ccirhken.ca/ccirh/checklist\\_website/index.html](http://www.ccirhken.ca/ccirh/checklist_website/index.html)
2. Série de podcasts sur la santé des immigrants, Cochrane Collaboration <http://community.cochrane.org/podcasts/issue/immigrant%20health/577>
3. Les soins aux enfants néo-canadiens, Société canadienne de pédiatrie (en anglais et en français) <http://www.kidsnewtocanada.ca/> (anglais) et <http://www.enfantsneocanadiens.ca/> (français)
4. Examen de la culture, du contexte ainsi que de la santé mentale et du bien-être psychosocial des réfugiés syriens par le Haut-Commissariat des Nations Unies pour les réfugiés [http://mhps.net/?get=250/culture\\_mental-health\\_syriens-final1.pdf](http://mhps.net/?get=250/culture_mental-health_syriens-final1.pdf)
5. Information sur la vaccination pour les enfants néo-canadiens <http://www.enfantsneocanadiens.ca/screening/immunizations>
6. Comité consultatif national de l'immunisation (CCNI). Guide canadien d'immunisation. <http://www.phac-aspc.gc.ca/publicat/cig-gci/index-fra.php>



7. Ressources additionnelles sur la santé mentale des réfugiés du Centre de ressources multiculturelles en santé mentale  
<http://www.multiculturalmentalhealth.ca/fr/>
8. Réseau de médecins offrant une aide médicale aux Syriens  
<http://uossm-canada.org>
9. Psychiatres et psychologues syriens (ou arabophones) offrant du soutien à la santé mentale aux réfugiés syriens à l'échelle mondiale  
<http://www.stmh.net>
10. Citoyenneté et Immigration Canada : profil de la Syrie  
<http://rrlip.ca/userdata/files/201/EN%20Syrian%20Population%20Profile.pdf>

## Notes de la fin

---

**Parties intéressées** : Kevin Pottie est consultant principal, Euro Health Group, Evidence Based Guidelines for Public Health for the European Union/European Economic Area (lignes directrices fondées sur des données probantes concernant la santé publique pour l'Union européenne et l'Espace économique européen), Centre européen de prévention et de contrôle des maladies. Kevin Pottie, Christina Greenaway, Ghada Hassan, Charles Hui et Laurence J. Kirmayer ont participé à l'élaboration des lignes directrices de la Collaboration canadienne pour la santé des immigrants et des réfugiés.

**Collaborateurs** : Les auteurs ont tous contribué dans la même mesure à la version préliminaire et à la révision du manuscrit et ont approuvé la version publiée; ils acceptent de se porter garants de l'ouvrage.

**Remerciements** : Les auteurs tiennent à remercier Shauna Hacker pour son aide dans le cadre de la révision du document, et la Collaboration canadienne pour la santé des immigrants et des réfugiés pour ses lignes directrices et examens systématiques essentiels.

Le présent article a été évalué par des pairs.  
Le scénario clinique est fictif.

## Références

---

1. Citoyenneté et Immigration Canada. Direction générale de la santé. Manuel des professionnels désignés 2013 <http://www.cic.gc.ca/francais/ressources/publications/md-manuel/index.asp> (21 novembre 2015.)
2. Pottie K, Greenaway C, Feightner J, et coll. Review: Evidence-based clinical guidelines for immigrants and refugees. CMAJ 2011; 183: E824-E925.
3. European Centre for Disease Prevention and Control. Infectious diseases of specific relevance to newly-arrived migrants in the EU/EEA. 2015  
<http://ecdc.europa.eu/en/publications/Publications/Infectious-diseases-of-specific-relevance-to-newly-arrived-migrants-in-EU-EEA> (19 novembre 2015)

4. Hassan G, Kirmayer LJ, Mekki- Berrada A, et coll. Culture, Context and the Mental Health and Psychosocial Wellbeing of Syrians: A Review for Mental Health and Psychosocial Support staff working with Syrians Affected by Armed Conflict, 2015, <http://www.unhcr.org/55f6b90f9.pdf> (21 novembre 2015)
5. Société canadienne de pédiatrie. Les soins aux enfants néo-canadiens. 2015 <http://www.enfantsneocanadiens.ca/>.
6. Pottie K, Dahal G, Georgiades C, Premji K, Hassan G., Do immigrant adolescents face higher rates of bullying and other violence, peer aggression and suicide than do non-immigrant adolescents? A systematic review. *Journal of Immigrant and Minority Health*, 2014. DOI: 10.1007/s10903-014-0108-6
7. Beiser M, Hou F, Hyman I, Tousignant M. Poverty, family process, and the mental health of immigrant children in Canada. *Am J Public Health* 2002;92:220-7.
8. Proctor NG, De Leo D, Newman L., Suicide and self-harm prevention for people in immigration detention. *Med J Aust* 2013;199:730-2.
9. Kronik R, Rousseau D, Cleveland J., Asylum-seeking children's experiences of detention in Canada: A qualitative study. *Am J Orthopsychiatry* 2015;85:287-294.
10. Viruell-Fuentes EA, Miranda PY, Abdulrahim S. More than culture: Structural racism, intersectionality theory, and immigrant health. *Social Science & Medicine* 2012;75:2099-2106.
11. WHO vaccine-preventable diseases: monitoring system. 2015 global summary. [http://apps.who.int/immunization\\_monitoring/globalsummary/countries?countrycriteria%5Bcountry%5D%5B%5D=SYR&commit=OK](http://apps.who.int/immunization_monitoring/globalsummary/countries?countrycriteria%5Bcountry%5D%5B%5D=SYR&commit=OK) (21 novembre 2015).
12. Comité consultatif national de l'immunisation (CCNI). Guide canadien d'immunisation. <http://www.phac-aspc.gc.ca/publicat/cig-gci/index-fra.php>. (21 novembre 2015).
13. Sengupta N BJ. A global perspective of the epidemiology and burden of Varicella-Zoster Virus. *Current Pediatric Reviews* 2009;5:207-28.
14. Greenaway C, Boivin JF, Cnossen C, et coll. Risk factors for susceptibility to varicella in newly arrived adult migrants in Canada. *Epidemiol Infect* 2014;142:1695-707.
15. Organisation mondiale de la Santé. Base de données de l'OMS sur la tuberculose dans le monde. <http://www.who.int/tb/country/en/>. (21 novembre 2015).
16. Cookson S, Abaza H, Clarke K, et al. Impact of and response to increased tuberculosis prevalence among Syrian refugees compared with Jordanian tuberculosis prevalence: case study of a tuberculosis public health strategy. *Conflict and Health* 2015;18. doi: 10.1186/s13031-015-0044-7
17. Greenaway C, Khan K, Schwartzman K. Chapitre 13. La surveillance et le dépistage de la tuberculose dans certaines populations à haut risque. Normes canadiennes pour la lutte

antituberculeuse 7e éd. 2013 Ottawa : Agence de la santé publique du Canada, L'Association pulmonaire et la Société canadienne de thoracologie.

18. Kowdley K, Wang C, Welch S, Roberts H, Brosgart C. Prevalence of chronic hepatitis B among foreign-born persons living in the United States by country of origin. *Hepatology* 2012;56:422–33.

19. Agence de santé publique du Canada. Soins primaires de l'hépatite B – Aide-Mémoire (VHB-AM). Modifié le 26 février 2014. Gouvernement du Canada.  
<http://www.phac-aspc.gc.ca/publicat/hep/hbv-vhb/index-fra.php>

20. Gower E, Estes C, Blach S, Razavi-Shearer K, Razavi H. Global epidemiology and genotype distribution of the hepatitis C virus infection. *J Hepatol* 2014;61:S45–57.

21. Chemaitelly H, Chaabna K, Abu-Raddad LJ. The Epidemiology of Hepatitis C Virus in the Fertile Crescent: Systematic Review and Meta-Analysis. *PLoS One* 2015 10(8):e0135281.

22. ONUSIDA 2014. Local epidemics issues brief. UNAIDS / JC2559/1/E ISBN 978-92-9253-039-6 © ONUSIDA, juin 2014, Programme commun des Nations Unies sur le VIH/sida (ONUSIDA).  
[http://www.unaids.org/sites/default/files/media\\_asset/JC2559\\_local-epidemics\\_en.pdf](http://www.unaids.org/sites/default/files/media_asset/JC2559_local-epidemics_en.pdf)  
(7 décembre 2015)

23. Schär F, Trostorf U, Giardina F, et coll. Strongyloides stercoralis: Global Distribution and Risk Factors. *PLoS Negl Trop Dis* 2013;7:2e2288.

24. Khan K, Heidebrecht C, Sears J, et coll. Intestinal Parasites: Strongyloides and Schistosoma: Evidence-based clinical guidelines for immigrants and refugees. *CMAJ* 2011;183:E865–8.

25. MADRE, The International Women's Human Rights (IWHR), Clinic at the City University of New York (CUNY) School of Law, The Women's International League for Peace and Freedom (WILPF). Seeking Accountability and Demanding Change: A Report on Women's Human Rights Violations in Syria before and during the Conflict. 2014  
[http://www.madre.org/uploads/misc/1402077548\\_SyriaCEDAWShadow%20FINAL%20ENG%205.27.14%20PDF.pdf](http://www.madre.org/uploads/misc/1402077548_SyriaCEDAWShadow%20FINAL%20ENG%205.27.14%20PDF.pdf).

26. Ellsberg M, Jansen HA, Heise L, Watts CH, Garcia-Moreno C, WHO Multi-country Study on Women's Health and Domestic Violence against Women Study Team. Intimate partner violence and women's physical and mental health in the WHO multi-country study on women's health and domestic violence: an observational study. *Lancet* 2008;371:1165–72.

27. Kirmayer LJ, Narasiah L, Munoz M, Rashid M, Ryder AG, Guzder J, Hassan G, Rousseau C, Pottie, K. Common mental health problems in immigrants and refugees: general approach in primary care. *CMAJ* 2011;183:E959–E967.

DOI:10.1503/cmaj.151422
